# Supplementary material for: Beyond reproduction: contextual expression of Same-Sex Sexual Behavior in invertebrates
Source: Research Square preprint supplement (doi:10.21203/rs.3.rs-8320320/v1), 2026-01-12
Supplement: Supplementary file 1 [file ef2ad2fa30b1dfeda5af9310.docx]

**Supplementary material**

**Table S1** Summary of documented cases of same-sex sexual behavior (SSB) across invertebrates. Each record includes the phylum, order, and species, type of sexual behavior observed, ecological context (field or laboratory), main hypothesis proposed to explain the behavior, reported fitness effects and full reference. This dataset compiles published evidence illustrating the diversity of taxa and contexts in which SSB has been reported

| **Phylum** | **Order** | **Species** | **Sexual Behavior** | **Context** | **Hypothesis supported** | **Fitness effect reported** | **Full Reference** |
| --- | --- | --- | --- | --- | --- | --- | --- |
| Arthropoda | Araneae | *Doryonychus raptor* | Male-male copulation | Field | None | None | Gillespie 1991 |
| Arthropoda | Araneae | *Portia fimbriata* | Male-male and female-female copulation | Field | None | None | Jackson 1982 |
| Echinodermata | Asteroidea | *Archaster angulatus* | Male-male pairing | Field | Indiscriminate mating | None | Keesing et al 2011 |
| Arthropoda | Blattodea | *Blaberus, Archimandrita, Byrsotria* | Male-male courtship | Laboratory | Adaptive | Positive | Wendelken and Barth 1985 |
| Arthropoda | Blattodea | *Blatta orientalis* | Male-male courtship | Field | None | None | Simon and Barth 1977 |
| Arthropoda | Blattodea | *Blattella germanica* | Male-male courtship | Field | None | None | Roth and Willis 1952 |
| Arthropoda | Blattodea | *Byrsotria fumigata* | Male-male copulation | Field | None | None | Barth 1964 |
| Arthropoda | Blattodea | *Byrsotria fumigata* | Male-male courtship | Field | None | None | Barth 1964 |
| Arthropoda | Blattodea | *Eublaberus distanti (Cockroaches)* | Male-male courtship | Laboratory | None | None | Kotyk and Varadínová 2017 |
| Arthropoda | Blattodea | *Eurycotis floridana* | Male-male courtship | Field | None | None | Barth 1968 |
| Arthropoda | Blattodea | *Henchoustedenia flexivitta* | Male-male copulation | Field | None | None | Rocha 1991 |
| Arthropoda | Blattodea | *Latiblattella angustifrons* | Male-male courtship | Field | None | None | Willis 1970 |
| Arthropoda | Blattodea | *Leucophaea maderae* | Male-male courtship | Field | None | None | Roth and Barth 1967 |
| Arthropoda | Blattodea | *Nauphoeta cinerea* | Male-male courtship | Field | None | None | Roth and Barth 1967 |
| Arthropoda | Blattodea | *Nauphoeta cinerea* | Male-male copulation | Field | None | None | Rocha 1991 |
| Arthropoda | Blattodea | *Parcoblatta fulvescens* | Male-male courtship | Field | None | None | Wendelken and Barth 1971 |
| Arthropoda | Blattodea | *Periplaneta americana* | Male-male copulation | Field | None | None | Simon and Barth 1977 |
| Arthropoda | Blattodea | *Periplaneta australasiae* | Male-male courtship | Field | None | None | Simon and Barth 1977 |
| Arthropoda | Blattodea | *Periplaneta brunnea* | Male-male courtship | Field | None | None | Simon and Barth 1977 |
| Arthropoda | Blattodea | *Periplaneta fuliginosa* | Male-male copulation | Field | None | None | Simon and Barth 1977 |
| Arthropoda | Blattodea | *Periplaneta japonica* | Male-male courtship | Field | None | None | Simon and Barth 1977 |
| Arthropoda | Blattodea | *Petasodes dominicana* | Male-male copulation | Field | None | None | Matthiesen 1990 |
| Arthropoda | Blattodea | *Supella longipalpa* | Male-male courtship | Field | None | None | Roth 1952 |
| Echinodermata | Camarodonta | *Lytechinus variegatus* | Male-male pairing | Field | Mistaken identity | None | McCarthy and Young 2002 |
| Mollusca | Cephalopoda | *Deep-sea squid spp.* | Male-male mounting | Field | Indiscriminate mating | None | Hoving and Robison 2012 |
| Mollusca | Cephalopoda | *Dosidicus gigas (Humboldt squid)* | Male-male copulation | Field | Indiscriminate mating | None | Hoving et al 2019 |
| Echinodermata | Cidaroida | *Stylocidaris lineata* | Male-male aggregations for reproduction | Field | Adaptive | None | Young et al 1992 |
| Arthropoda | Coleoptera | *Acanthoscelides obtectus* | Male-male and female-female mounting | Lab | Mistaken identity | Negative | Stojković et al 2010 |
| Arthropoda | Coleoptera | *Aclees sp. cf. foveatus* | Male-male mounting | Field | None | None | Benelli et al 2014a |
| Arthropoda | Coleoptera | *Aegus chelifer chelifer* | Male-male mounting | Lab | Mistaken identity | None | Songvorawit et al 2019 |
| Arthropoda | Coleoptera | *Aleochara curtula* | Male-male and male-to-female transvestism copulation | Field | None | None | Peschke 1987 |
| Arthropoda | Coleoptera | *Antitrogus consanguineus* | Male-male copulation | Field | None | None | Allsopp and Morgan 1991 |
| Arthropoda | Coleoptera | *Bolitotherus cornutus* | Male-male copulation | Laboratory | Adaptive | None | Mitchem et al 2019 |
| Arthropoda | Coleoptera | *Callosobruchus chinensis* | Female-female copulation | Field | None | None | Nakamura 1969 |
| Arthropoda | Coleoptera | *Callosobruchus maculatus* | Male and female same-sex mounting | Laboratory / Field | Adaptive | Variable and complex | Berger et al 2016 |
| Arthropoda | Coleoptera | *Ceruchus sp.* | Male-male copulation | Field | None | None | Mathieu 1969 |
| Arthropoda | Coleoptera | *Cotalpa lanigera* | Male-male copulation | Field | None | None | Hayes 1927 |
| Arthropoda | Coleoptera | *Cyclocephala distincta* | Male-male courtship | Lab | Mistaken identity | None | Nobrega 2022 |
| Arthropoda | Coleoptera | *Cyclocephala immaculata* | Male-male copulation | Field | None | None | Hayes 1927 |
| Arthropoda | Coleoptera | *Diaprepes abbreviatus* | Female-female mounting | Lab | Mistaken identity | Negative | Harari et al 2000 |
| Arthropoda | Coleoptera | *Diaprepes abbreviatus* | Female-female copulation | Field | None | None | Harari and Brockmann 1999 |
| Arthropoda | Coleoptera | *Dorcus sp* | Male-male copulation | Field | None | None | Mathieu 1969 |
| Arthropoda | Coleoptera | *Euscepes postfasciatus (Weevil)* | Male-male copulation | Laboratory | Mistaken identity | None | Isa et al 2019 |
| Arthropoda | Coleoptera | *Gnatocerus cornutus* | Male-male mounting | Laboratory | Adaptive | Positive | Lane et al 2016 |
| Arthropoda | Coleoptera | *Hypera postica* | Female-female copulation | Field | None | None | LeCato and Pienkowski 1970 |
| Arthropoda | Coleoptera | *Leistotrophus versicolor* | Male-male and male-to-female transvestism copulation | Field | None | None | Forsyth and Alcock 1990 |
| Arthropoda | Coleoptera | *Lucanus sp* | Male-male copulation | Field | None | None | Mathieu 1969 |
| Arthropoda | Coleoptera | *Macrodactylus subspinosa* | Male-male copulation | Field | None | None | Bennett 1974 |
| Arthropoda | Coleoptera | *Meloe angusticollis* | Male-male copulation | Field | None | None | Pinto and Selander 1970 |
| Arthropoda | Coleoptera | *Meloe dianella* | Male-male copulation | Field | None | None | Pinto and Selander 1970 |
| Arthropoda | Coleoptera | *Meloe proscarabaeus* | Male-male and female-female copulation | Field | None | None | Bologna and Marangoni 1986 |
| Arthropoda | Coleoptera | *Meloe violaceus* | Male-male and female-female copulation | Field | None | None | Bologna and Marangoni 1986 |
| Arthropoda | Coleoptera | *Melolontha vulgaris* | Male-male copulation | Field | None | None | Noel 1985; Gadeau de Kerville 1896 |
| Arthropoda | Coleoptera | *Nicrophorus spp* | Male-male copulation | Laboratory | Adaptive | None | Engel et al 2015 |
| Arthropoda | Coleoptera | *Otiorrhynchus pupillatus* | Female-female copulation | Field | None | None | Pardi 1987 |
| Arthropoda | Coleoptera | *Pelidnota punctata* | Male-male copulation | Field | None | None | Hayes 1927 |
| Arthropoda | Coleoptera | *Phoracantha semipunctata* | Female-female copulation | Field | None | None | Hanks et al 1996 |
| Arthropoda | Coleoptera | *Platycerus sp.* | Male-male copulation | Field | None | None | Mathieu 1969 |
| Arthropoda | Coleoptera | *Polyphylla hammondi* | Male-male copulation | Field | None | None | Hayes 1927 |
| Arthropoda | Coleoptera | *Popillia japonica* | Male-male mounting | Field | Indiscriminate mating | Negative | Switzer et al 2014 |
| Arthropoda | Coleoptera | *Popillia japonica* | Male-male and female-female copulation | Field | None | None | Fleming 1972; Barrows and Gordh 1978 |
| Arthropoda | Coleoptera | *Tribolium castaneum* | Male-male copulation | Lab | Indiscriminate mating | None | Martens et al 2024 |
| Arthropoda | Coleoptera | *Tribolium castaneum* | Male-male copulation | Lab | Social context | None | Martin et al 2015 |
| Arthropoda | Coleoptera | *Tribolium castaneum* | Male-male copulation | Lab | Mistaken identity | Negative | Sales et al 2018 |
| Arthropoda | Coleoptera | *Tribolium castaneum* | Male-male copulation | Field | None | None | Serrano et al 1991; Castro et al 1994 |
| Arthropoda | Coleoptera | *Xylotrechus pyrrhoderus* | Female-female copulation | Field | None | None | Iwabuchi 1988 |
| Arthropoda | Decapoda | *Calappa lophos* | Male-male copulation | Lab | Social context | None | Kazmi and Tirmizi 1987 |
| Arthropoda | Decapoda | *Calappa lophos* | Male-male copulation | Field | None | None | Kazmi and Tirmizi 1987 |
| Arthropoda | Decapoda | *Lysmata wurdemanni* | Male-male courtship | Field and lab | Adaptive | None | Baeza and Bauer 2004 |
| Arthropoda | Diptera | *Ceratitis capitata* | Male-male and female-female copulation | Field | None | None | Prokopy and Hendrichs 1979; Arita & Kaneshirto 1983 |
| Arthropoda | Diptera | *Cochliomyia homnivorax* | Male-male and female-female copulation | Field | None | None | Fletcher et al 1966 |
| Arthropoda | Diptera | *Dolichopus popularis* | Male-male copulation | Field | None | None | Qvick 1984 |
| Arthropoda | Diptera | *Drosophila affinis* | Male-male copulation | Field | None | None | Bristowe 1929 |
| Arthropoda | Diptera | *Drosophila melanogaster* | Male-male courtship | Lab | Social context | None | Bailey et al 2013 |
| Arthropoda | Diptera | *Drosophila melanogaster* | Male-male courtship | Lab | Adaptive | None | Dukas 2010 |
| Arthropoda | Diptera | *Drosophila melanogaster* | Male-male courtship | Lab | Mistaken identity | None | Macchiano et al 2018 |
| Arthropoda | Diptera | *Drosophila melanogaster* | Male-male courtship | Lab | Adaptive | None | Pan et al 2022 |
| Arthropoda | Diptera | *Drosophila melanogaster* | Male-male courtship | Review | Adaptive | Negative | Yamamoto and Nakano 1999 |
| Arthropoda | Diptera | *Drosophila melanogaster* | Male-male copulation and courtship | Lab | Adaptive | Negative | Hoskins et al 2015 |
| Arthropoda | Diptera | *Drosophila melanogaster* | Male-male and female-female copulation | Field | None | None | Finley et al 1997 |
| Arthropoda | Diptera | *Euarestoides acutangulus* | Male-male copulation | Field | None | None | Piper 1976 |
| Arthropoda | Diptera | *Euleia fratria* | Male-male copulation | Field | None | None | Tauber and Toschi 1965 |
| Arthropoda | Diptera | *Fannia femoralis* | Male-male copulation | Field | None | None | Tauber 1968 |
| Arthropoda | Diptera | *Fucellia maritima* | Male-male copulation | Field | None | None | Bristowe 1929 |
| Arthropoda | Diptera | *Fucomyia frigida* | Male-male copulation | Field | None | None | Bristowe 1929 |
| Arthropoda | Diptera | *Glossina morsitans* | Male-male copulation | Field | None | None | Schlein et al 1981 |
| Arthropoda | Diptera | *Hermetia illucens (Black soldier fly)* | Male-male courtship | Lab | Mistaken identity | None | Giunti et al 2018 |
| Arthropoda | Diptera | *Hypoderma tarandi* | Male-male copulation | Field | None | None | Anderson et al 1994 |
| Arthropoda | Diptera | *Leucopis palumbii* | Male-male courtship | Lab | Indiscriminate mating | None | Benelli et al 2014b |
| Arthropoda | Diptera | *Medetera spp* | Male-male copulation | Field | None | None | Bickel and Dyte 1989 |
| Arthropoda | Diptera | *Musca domestica* | Male-male copulation | Field | None | None | Schlein et al 1981 |
| Arthropoda | Diptera | *Protophormia terrae-novae* | Male-male copulation | Field | None | None | Parker 1970 |
| Arthropoda | Diptera | *Scatella sp.* | Male-male copulation | Field | None | None | Bristowe 1929 |
| Arthropoda | Diptera | *Sphyracephala detrahens* | Male-male and female-female courtship | Lab | Mistaken identity | None | Takeda et al 2020 |
| Arthropoda | Diptera | *Stictochironomus crassiforceps* | Male-male copulation | Field | None | None | Syrjämäki 1964; Sanders 1975 |
| Acanthocephala | Echinorhynchida | *Acanthocephalus parksidei* | Male-male copulation | Field | None | None | Abele and Gilchrist 1977 |
| Acanthocephala | Echinorhynchida | *Echinorhynchus truttae* | Male-male copulation | Field | None | None | Abele and Gilchrist 1977 |
| Acanthocephala | Echinorhynchida | *Moniliformis moniliformis* | Male-male mounting | Field | Indiscriminate mating | Negative | Abele and Gilchrist 1977 |
| Annelida | Eunicida | *Ophryotrocha diadema* | Male-male copulation | Lab | Mistaken identity | None | Lorenzi et al 2019 |
| Arthropoda | Hemiptera | *Afrocimex sp.* | Male-male copulation | Field | None | None | Carayon 1966; Dunkle 1991 |
| Arthropoda | Hemiptera | *Alloeorhynchus furens* | Male-male copulation | Field | None | None | Carayon 1966 |
| Arthropoda | Hemiptera | *Ambrysus occidentalis* | Male-male copulation | Field | None | None | Constantz 1974 |
| Arthropoda | Hemiptera | *Bactericera cockerelli* | Male-male courtship | Lab | Indiscriminate mating | None | Avosani et al 2020 |
| Arthropoda | Hemiptera | *Callosobruchus maculatus* | Male-male and female-female mounting | Lab | Adaptive | None | Burgevin et al 2013 |
| Arthropoda | Hemiptera | *Cimex lectularius* | Male-male copulation | Field | None | None | Carayon 1966; Dunkle 1991 |
| Arthropoda | Hemiptera | *Cimex lectularius (bed bugs)* | Male-male copulation | Lab | Mistaken identity | Negative | Ryne 2009 |
| Arthropoda | Hemiptera | *Embiophila sp.* | Male-male copulation | Field | None | None | Carayon 1966; Dunkle 1991 |
| Arthropoda | Hemiptera | *Gerris lacustris (Water strider)* | Male-male copulation | Lab | Social context | None | Han et al 2016 |
| Arthropoda | Hemiptera | *Hesperoctenes sp.* | Male-male copulation | Field | None | None | Carayon 1966 |
| Arthropoda | Hemiptera | *Latrocimex spectans* | Male-male copulation | Field | None | None | Carayon 1966 |
| Arthropoda | Hemiptera | *Limnoportus notabilid* | Male-male copulation | Field | None | None | Spence and Wilcox 1986 |
| Arthropoda | Hemiptera | *Limnoporus dissortis* | Male-male copulation | Field | None | None | Spence and Wilcox 1986 |
| Arthropoda | Hemiptera | *Nezara viridula* | Male-male copulation | Field | None | None | Harris and Todd 1980 |
| Arthropoda | Hemiptera | *Oncopeltus fasciatus* | Male-male copulation | Field | None | None | Loher and Gordon 1968 |
| Arthropoda | Hemiptera | *Palmacorixa nana* | Male-male copulation | Field | None | None | Aiken 1981 |
| Arthropoda | Hemiptera | *Tenagogerris euphrosyne* | Male-male copulation | Lab | Adaptive | Positive | Han and Brooks 2015 |
| Arthropoda | Hemiptera | *Xylocoris maculipennis* | Male-male copulation | Field | None | None | Carayon 1966 |
| Arthropoda | Hymenoptera | *Aethina tumida* | Male-male copulation | Lab | Social context | None | Mustafa et al 2015 |
| Arthropoda | Hymenoptera | *Aphidius colemani* | Male-male courtship and mounting | Lab | None | None | Dunkle 1991; Benelli et al 2013a |
| Arthropoda | Hymenoptera | *Aphidius colemani* | Male-male mounting, antennal rubbing | Lab | Indiscriminate mating | None | Dunkle 1991; Benelli et al 2014c |
| Arthropoda | Hymenoptera | *Aphidius ervi* | Male-male copulation | Lab | None | None | Dunkle 1991; He 2008 |
| Arthropoda | Hymenoptera | *Centris pallida* | Male-male copulation | Field | None | None | Alcock and Buchmann 1985 |
| Arthropoda | Hymenoptera | *Cortesia rubecula* | Male-male and female-female copulation | Field | None | None | Field and Keller 1993 |
| Arthropoda | Hymenoptera | *Diaeretiella rapae* | Male-male copulation | Field | Social context | None | Dunkle 1991; Kant et al 2012 |
| Arthropoda | Hymenoptera | *Formica subpolita* | Male-male copulation | Field | None | None | O′ Neill 1994 |
| Arthropoda | Hymenoptera | *Habropoda laboriosa* | Male-male copulation | Field | None | None | Cane 1994 |
| Arthropoda | Hymenoptera | *Megarhyssa atrata* | Male-male copulation | Field | None | None | Heatwole et *al 1962* |
| Arthropoda | Hymenoptera | *Megarhyssa macrurus* | Male-male copulation | Field | None | None | Heatwole et *al 1962* |
| Arthropoda | Hymenoptera | *Osmia cornuta, O. bicornis* | Male-male copulation | Lab | Mistaken identity | None | Seidelmann 2023 |
| Arthropoda | Hymenoptera | *Psyttalia concolor* | Male-male courtship | Lab | Adaptive | None | Dunkle 1991; Benelli and Canale 2012 |
| Arthropoda | Hymenoptera | *Psyttalia concolor* | Male-male courtship | Lab | Adaptive | None | Dunkle 1991; Benelli and Canale 2012 |
| Arthropoda | Hymenoptera | *Psyttalia concolor* | Male-male and female-female courtship | Lab | Adaptive | None | Dunkle 1991; Benelli et al 2013b |
| Arthropoda | Isoptera | *Coptotermes spp.* | Male-male and female-female tandem | Lab | Social and environmental influences (pheromones) | Positive | Mizumoto et al 2024 |
| Arthropoda | Isoptera | *Not specified (termites)* | Male-male and female-female pairing | Lab | Adaptive | Positive | Wu et al 2023 |
| Arthropoda | Isoptera | *Reticulitermes chinensis* | Tandem running | Lab | Adaptive | Positive | Li et al 2013 |
| Arthropoda | Isoptera | *Reticulitermes flavipes* | Male-male pairing | Lab | Adaptive | Positive | Mizumoto et al 2016 |
| Arthropoda | Isoptera | *Reticulitermes speratus* | Tandem running | Lab | Adaptive | Positive | Matsuura et al 2002 |
| Arthropoda | Isoptera | *Reticulitermes speratus* | Female-female tandem | Lab | Social context | Variable and complex | Matsuura and Nishida 2001 |
| Arthropoda | Lepidoptera | *Acraea andromacha* | Male-male courtship | Field | None | None | Alcock 1993 |
| Arthropoda | Lepidoptera | *Acraea encedon* | Female-female copulation | Field | None | None | Jiggins et al 2000 |
| Arthropoda | Lepidoptera | *Acrolepiopsis assectella* | Male-male copulation | Field | None | None | Lecomte et al 1988 |
| Arthropoda | Lepidoptera | *Antheraea mylitta* | Male-male copulation | Field | None | None | Chaudhuri and Sinha 1994 |
| Arthropoda | Lepidoptera | *Bicyclus anynana* | Male-male courtship | Field | None | None | Costanzo and Monteiro 2007 |
| Arthropoda | Lepidoptera | *Bombyx mori* | Male-male copulation | Field | None | None | Berlese 1909 |
| Arthropoda | Lepidoptera | *Choristoneura fumiferana* | Male-male copulation and courtship | Field | None | None | Palaniswamy et al 197 |
| Arthropoda | Lepidoptera | *Copitarsia decolora* | Male-male copulation | Field | None | None | Caballero-Mendieta and Cordero 2012 |
| Arthropoda | Lepidoptera | *Corcyra cephalonica* | Male-male copulation | Field | None | None | Hall et al 1987 |
| Arthropoda | Lepidoptera | *Cyaniris semiargus maroccana* | Male-male copulation | Field | None | None | Tennent 1987 |
| Arthropoda | Lepidoptera | *Danaus erippus* | Male-male copulation | Field | None | None | Hay-Roe et al 2007 |
| Arthropoda | Lepidoptera | *Danaus gilippus berenice* | Male-male courtship | Field | None | None | Brower 1965 |
| Arthropoda | Lepidoptera | *Danaus plexippus* | Male-male copulation | Field | None | None | Solensky 2004; Hay-Roe et al 2007 |
| Arthropoda | Lepidoptera | *Eucheira socialis* | Male-male copulation | Field | None | None | Shapiro 1990 |
| Arthropoda | Lepidoptera | *Euphydryas aditha* | Male-male courtship and copulation | Field | None | None | Shah et al 1986 |
| Arthropoda | Lepidoptera | *Euphydryas anicia* | Male-male copulation | Field | None | None | Odendaal et al 1989 |
| Arthropoda | Lepidoptera | *Eupoecilia ambiguella* | Male-male courtship | Field | None | None | Kuenen and Baker 1983 |
| Arthropoda | Lepidoptera | *Grapholitha molesta* | Male-male copulation | Field | None | None | Benz 1973 |
| Arthropoda | Lepidoptera | *Heliconius charithonia* | Male-male copulation | Field | None | None | Estrada et al 2010 |
| Arthropoda | Lepidoptera | *Jalmenus evagoras* | Male-male copulation | Field | None | None | Elgar and Pierce 1988 |
| Arthropoda | Lepidoptera | *Junonia coenia* | Male-male courtship | Field | None | None | Hafernik 1982 |
| Arthropoda | Lepidoptera | *Laspeyresia pomonella* | Male-male copulation | Field | None | None | Benz 1973 |
| Arthropoda | Lepidoptera | *Pieris brassicae* | Male-male copulation | Field | None | None | David and Gardiner 1961 |
| Arthropoda | Lepidoptera | *Pieris rapae crucivora* | Male-male copulation | Field | None | None | Bagemihl 1999 |
| Arthropoda | Lepidoptera | *Pieris rapae rapae* | Male-male copulation | Field | None | None | Obara and Majerus 2000 |
| Arthropoda | Lepidoptera | *Zeiraphera diniana* | Male-male copulation | Field | None | None | Benz 1973 |
| Arthropoda | Littorinimorpha | *Crepidula fornicata* | Male-male copulation | Lab | None | None | Ambrogio and Pechenik 2008 |
| Platyhelminthes | Macrostomida | *Macrostomum hystrix* | Hypodermic self-insemination (related to SSB) | Field | Adaptive | NA | Ramm et al 2015 |
| Arthropoda | Microcoryphia | *Promesomachilis hispanica* | Male-male copulation | Field | None | None | Sturm 1992 |
| Acanthocephala | Moniliformida | *Moniliformis dubius* | Male-male copulation | Field | None | None | Abele and Gilchrist 1977 |
| Arthropoda | Neuroptera | *Chrysopa carnea* | Male-male copulation | Field | None | None | Henry 1979 |
| Arthropoda | Octopoda | 2 Unendentified Incirrata family | Male-male copulation | Field | None | None | Lutz and Voight 1994 |
| Arthropoda | Odonata | *Calopteryx haemorrhoidalis* | Male-male copulation | Field | None | None | Utzeri and Belfiore 1990 |
| Arthropoda | Odonata | *Calopteryx splendens* | Male-male tandem | Field | Adaptive | None | Gołąb and Śniegula 2012 |
| Arthropoda | Odonata | *Cercion hieroglyphicum* | Male-male copulation | Field | None | None | Utzeri and Belfiore 1990 |
| Arthropoda | Odonata | *Ceriagrion nipponicum* | Male-male copulation | Field | None | None | Utzeri and Belfiore 1990 |
| Arthropoda | Odonata | *Ceriagrion tenellum* | Male-male copulation | Field | None | None | Utzeri and Belfiore 1990 |
| Arthropoda | Odonata | *Enallagma cyathigerum* | Male-male copulation | Field | None | None | Utzeri and Belfiore 1990 |
| Arthropoda | Odonata | *Gomphus adelphus* | Male-male copulation | Field | None | None | Utzeri and Belfiore 1990 |
| Arthropoda | Odonata | *Gomphus apomyius* | Male-male copulation | Field | None | None | Utzeri and Belfiore 1990 |
| Arthropoda | Odonata | *Gomphus dilatatus* | Male-male copulation | Field | None | None | Utzeri and Belfiore 1990 |
| Arthropoda | Odonata | *Gomphus geminatus* | Male-male copulation | Field | None | None | Utzeri and Belfiore 1990 |
| Arthropoda | Odonata | *Gomphus lineatifrons* | Male-male copulation | Field | None | None | Utzeri and Belfiore 1990 |
| Arthropoda | Odonata | *Gomphus modestus* | Male-male copulation | Field | None | None | Utzeri and Belfiore 1990 |
| Arthropoda | Odonata | *Gomphus ozarkensis* | Male-male copulation | Field | None | None | Utzeri and Belfiore 1990 |
| Arthropoda | Odonata | *Gomphus parvidens* | Male-male copulation | Field | None | None | Utzeri and Belfiore 1990 |
| Arthropoda | Odonata | *Gomphus vastus* | Male-male copulation | Field | None | None | Utzeri and Belfiore 1990 |
| Arthropoda | Odonata | *Gomphus viridifrons* | Male-male copulation | Field | None | None | Utzeri and Belfiore 1990 |
| Arthropoda | Odonata | *Hagenius brevistylus* | Male-male copulation | Field | None | None | Utzeri and Belfiore 1990 |
| Arthropoda | Odonata | *Ischnura elegans* | Male-male copulation | Lab | Social context | Positive | Van Gossum et al 2005 |
| Arthropoda | Odonata | *Ischnura elegans* | Male-male copulation | Field | None | None | Utzeri and Belfiore 1990 |
| Arthropoda | Odonata | *Ischnura graellsii* | Male-male copulation | Field | None | None | Utzeri and Belfiore 1990 |
| Arthropoda | Odonata | *Ischnura senegalensis* | Male-male copulation | Field | None | None | Utzeri and Belfiore 1990 |
| Arthropoda | Odonata | *Lestes barbarus* | Male-male copulation | Field | None | None | Utzeri and Belfiore 1990 |
| Arthropoda | Odonata | *Lestes disjunctus* | Male-male copulation | Field | None | None | Utzeri and Belfiore 1990 |
| Arthropoda | Odonata | *Lestes sponsa* | Male-male copulation | Field | None | None | Utzeri and Belfiore 1990 |
| Arthropoda | Odonata | *Lestes viridis* | Male-male copulation | Field | None | None | Utzeri and Belfiore 1990 |
| Arthropoda | Odonata | *Leucorrhinia caudalis* | Male-male copulation | Field | None | None | Utzeri and Belfiore 1990 |
| Arthropoda | Odonata | *Leucorrhinia dubia* | Male-male copulation | Field | None | None | Utzeri and Belfiore 1990 |
| Arthropoda | Odonata | *Leucorrhinia hudsonica* | Male-male copulation | Field | None | None | Utzeri and Belfiore 1990 |
| Arthropoda | Odonata | *Leucorrhinia rubicunda* | Male-male copulation | Field | None | None | Utzeri and Belfiore 1990 |
| Arthropoda | Odonata | *Nehalennia gracilis* | Male-male copulation | Field | None | None | Utzeri and Belfiore 1990 |
| Arthropoda | Odonata | *Sympecma paedisca* | Male-male copulation | Field | None | None | Utzeri and Belfiore 1990 |
| Arthropoda | Odonata | *Sympetrum striolatum* | Male-male copulation | Field | None | None | Utzeri and Belfiore 1990 |
| Arthropoda | Odonata | *Trigomphus melampus* | Male-male copulation | Field | None | None | Utzeri and Belfiore 1990 |
| Arthropoda | Opiliones | Non identified | Male-male copulation | Field | None | None | Bristowe 1929 |
| Arthropoda | Orthoptera | *Acheta firmus* | Male-male copulation | Field | None | None | Alexander 1961 |
| Arthropoda | Orthoptera | *Endecous chape* | Male-male courtship | Lab | Mistaken identity | None | Fianco et al 2018 |
| Arthropoda | Orthoptera | *Gryllus veletis* | Male-male courtship and mounting | Lab | Mistaken identity | None | Boutin et al 2016 |
| Arthropoda | Orthoptera | *Locusta migratoria* | Male-male copulation | Field | None | None | Mika 1959 |
| Arthropoda | Orthoptera | *Schistocerca gregaria (Desert locust)* | Male-male mounting | Lab | Social context | None | Clancy et al 2017 |
| Arthropoda | Orthoptera | *Teleogryllus occipitalis (Crickets)* | Male–male courtship | Field and lab | Adaptive | None | Kuriwada 2017 |
| Arthropoda | Orthoptera | *Teleogryllus oceanicus* | Male-male mounting and courtship | Lab | Indiscriminate mating | Negative | Bailey and French 2012 |
| Arthropoda | Orthoptera | *Teleogryllus oceanicus* | Male-male copulation | Lab | Indiscriminate mating | None | Richardson and Zuk 2023 |
| Arthropoda | Orthoptera | *Teleogryllus oceanicus* | Male-male copulation | Lab | Indiscriminate mating | None | Richardson et al 2024 |
| Arthropoda | Orthoptera | *Xenogryllus marmoratus* | Male-male mounting | Field | Social context | None | Olivero and Robillard 2017 |
| Acanthocephala | Polymorphida | *Polymorphus minutus* | Male-male copulation | Field | None | None | Abele and Gilchrist 1977 |
| Acanthocephala | Rhabditida | *Nippostrongylus brasiliensis* | Female-female chemotatic attraction and male-male pairing | Field | None | None | Roberts and Torson 1977 |
| Arthropoda | Rhabditida | *Caenorhabditis spp* | Male-male copulation | Field | Adaptive | None | Noble et al 2015 |
| Arthropoda | Rhabditida | *Cylindrocorpus longistoma* and *C. curzii* | Male-male copulation | Lab | Mistaken identity | None | Chin and Taylor 1969 |
| Arthropoda | Siphonaptera | *Ceratophyllus gallinae* | Male-male copulation | Field | None | None | Humphries 1967 |

**Table S2** List of 85 Orders with No Reported SSB used to explore phylogenetic signals in the evolutionary conservatism of SSB

| **Order** | **Common Name/Group** | **Phylum** |
| --- | --- | --- |
| Actiniaria | Sea anemones | Cnidaria |
| Alcyonacea | Soft corals | Cnidaria |
| Amphipoda | Scuds, sideswimmers | Arthropoda |
| Anostraca | Fairy shrimp | Arthropoda |
| Architaenioglossa | Land and freshwater snails | Mollusca |
| Arhynchobdellida | Jawless leeches | Annelida |
| Astigmatina | Mites | Arthropoda |
| Calanoida | Copepods | Arthropoda |
| Capitellida | Polychaete worms | Annelida |
| Cheilostomatida | Bryozoans (moss animals) | Bryozoa |
| Chitonida | Chitons | Mollusca |
| Cladocera | Water fleas | Arthropoda |
| Collembola | Springtails | Arthropoda |
| Comatulida | Feather stars | Echinodermata |
| Cumacea | Cumaceans | Arthropoda |
| Cyclopoida | Copepods | Arthropoda |
| Cyclophyllidea | Tapeworms | Platyhelminthes |
| Cypridinida | Ostracods (seed shrimp) | Arthropoda |
| Diplopoda | Millipedes | Arthropoda |
| Diplostraca | Clam shrimp | Arthropoda |
| Dorylaimida | Predatory/omnivorous nematodes | Nematoda |
| Embioptera | Webspinners | Arthropoda |
| Enoplida | Free-living marine nematodes | Nematoda |
| Ephemeroptera | Mayflies | Arthropoda |
| Euphausiacea | Krill | Arthropoda |
| Forcipulatida | Sea stars | Echinodermata |
| Geophilomorpha | Soil centipedes | Arthropoda |
| Gorgonacea | Sea fans | Cnidaria |
| Haplosclerida | Demosponges | Porifera |
| Harpacticoida | Copepods | Arthropoda |
| Hirudinida | Leeches | Annelida |
| Holothuriida | Sea cucumbers | Echinodermata |
| Hydroida | Hydroids | Cnidaria |
| Isopoda | Woodlice, pill bugs | Arthropoda |
| Ixodida | Ticks | Arthropoda |
| Julida | Millipedes | Arthropoda |
| Limoida | File clams | Mollusca |
| Lithobiomorpha | Stone centipedes | Arthropoda |
| Lumbricida | Earthworms | Annelida |
| Lumbriculida | Freshwater worms | Annelida |
| Mantodea | Mantises | Arthropoda |
| Mecoptera | Scorpionflies | Arthropoda |
| Megaloptera | Dobsonflies, alderflies | Arthropoda |
| Mesogastropoda | Marine and freshwater snails | Mollusca |
| Mictacea | Crustaceans | Arthropoda |
| Mysida | Opossum shrimp | Arthropoda |
| Mytilida | Mussels | Mollusca |
| Nassellaria | Radiolarians | Retaria |
| Neogastropoda | Sea snails | Mollusca |
| Notostraca | Tadpole shrimp | Arthropoda |
| Nuculanida | Nut clams | Mollusca |
| Ophiurida | Brittle stars | Echinodermata |
| Orbiniida | Polychaete worms | Annelida |
| Ostreida | Oysters | Mollusca |
| Pectinida | Scallops | Mollusca |
| Pennatulacea | Sea pens | Cnidaria |
| Phasmida | Stick insects | Arthropoda |
| Phyllodocida | Polychaete worms | Annelida |
| Plecoptera | Stoneflies | Arthropoda |
| Poecilosclerida | Demosponges | Porifera |
| Polydesmida | Millipedes | Arthropoda |
| Protura | Coneheads | Arthropoda |
| Psocodea | Barklice, booklice | Arthropoda |
| Raphidioptera | Snakeflies | Arthropoda |
| Rhynchonellida | Brachiopods (lamp shells) | Brachiopoda |
| Sabellida | Feather duster worms | Annelida |
| Scleractinia | Stony corals | Cnidaria |
| Scolopendromorpha | Tropical centipedes | Arthropoda |
| Scorpiones | Scorpions | Arthropoda |
| Scutigeromorpha | House centipedes | Arthropoda |
| Solifugae | Camel spiders, wind scorpions | Arthropoda |
| Spatangoida | Heart urchins | Echinodermata |
| Spionida | Polychaete worms | Annelida |
| Spirobolida | Millipedes | Arthropoda |
| Stomatopoda | Mantis shrimp | Arthropoda |
| Strepsiptera | Twisted-wing parasites | Arthropoda |
| Stylommatophora | Land snails and slugs | Mollusca |
| Tanaidacea | Tanaids | Arthropoda |
| Terebellida | Spaghetti worms | Annelida |
| Thecostraca | Barnacles | Arthropoda |
| Thysanoptera | Thrips | Arthropoda |
| Tricladida | Planarians | Platyhelminthes |
| Trichoptera | Caddisflies | Arthropoda |
| Zoraptera | Angel insects | Arthropoda |
| Zygentoma | Silverfish | Arthropoda |

**Figure S1.** Summary of the literature screening and inclusion process for studies on same-sex sexual behavior (SSB) in invertebrates. Based on: Page et al. 2021, doi:10.1136/bmj.n71

**Identification of studies via databases and registers**

Records removed *before screening*:

Duplicate records removed (n = 167)

Records marked as ineligible by automation tools (n = 0)

Records removed for other reasons (n = 0)

Records identified from*:

Databases (n = 842)

Registers (n = 0)

**Identification**

Records screened

(n = 675)

Records excluded**

(n = 394)

Reports sought for retrieval

(n = 281)

Reports not retrieved

(n = 50)

**Screening**

Reports assessed for eligibility

(n = 231)

Reports excluded:

Reason – No original behavioral data (n = 20)

Studies included in review

(n = 219)

**Included**

**Figure S2.** Relative Reporting Index (RRI × 1000) for SSB across 24 invertebrate orders. This visualization highlights both strong taxonomic biases in research effort and the uneven distribution of SSB documentation across invertebrate lineages.
